# Supplementary material for: Substantial trace metal input from the 2022 Hunga Tonga-Hunga Ha’apai eruption into the South Pacific
Source: Nat Commun. 2024 Oct 18;15:8986. doi: 10.1038/s41467-024-52904-3 (PMC11487076; doi:10.1038/s41467-024-52904-3)
Supplement: Supplementary file 3 — Supplementary Data 1 [file 41467_2024_52904_MOESM3_ESM.xlsx]

## Sheet: Data table
Station	Tow-Fish ID	Latitude (°N)	Longitude (°E)	UTC Date of Sampling	UTC time of sampling	Depth (m)	Nd isotopic composition (εNd)	εNd-2SE	εNd-2SD	Nd (pmol/kg)_Isotope Dilution	Nd-2SD (pmol/kg)_Isotope Dilution	Rare Earth Element (REE) concentrations														Post-Archean Australian Shale (PAAS) normalized REE ratios				Dissolved Trace Metal (TM) concentrations (nmol/L)						total chlorophyll a (TChl-a) inventory (mg/m2)
												La	Ce	Pr	Nd	Sm	Eu	Gd	Tb	Dy	Ho	Er	Tm	Yb	Lu	Ce/Ce*PAAS	Ce/Ce*PAAS - 2SD	HREE/LREEPAAS	HREE/LREEPAAS-2SD	dMn	dMn-SD	dFe	dFe-SD	dAl	dAl-SD
Seawater samples												Dissolved REE concentrations (pmol/kg)
1		-33.6075	-71.729	23.02.2022	17:18:26	6	-0.890719	0.123287	0.15	19.2245	0.0768981	19.9105	25.4465	4.22498	18.4315	3.44156	0.799765	3.88981	0.550834	3.89863	0.995163	3.08271		2.51657	0.392921	0.64087	0.106663	2.13011	0.149593							37.6716
2	10001	-33.0902	-71.8253	23.02.2022	22:20:30	5	-2.49346	0.108268	0.15	10.6773	0.0427092	17.1562	18.6124	3.03313	12.7503	2.2684	0.533566	2.74011	0.401561	2.91514	0.808362	2.51914		2.01012	0.318568	0.591601	0.0989564	2.43562	0.170314	1.85327	0.166794	0.810492	0.054303	7.42	0.02	69.2214
3	10002	-32.9673	-71.8639	24.02.2022	00:51:02	5	-1.66254	0.143289	0.15	9.36923	0.0374769	13.2689	9.4973	2.08372	9.33406	1.53303	0.368113	1.92013	0.280541	2.18092	0.645584	2.10202		1.6187	0.247277	0.410348	0.0688476	2.70885	0.19085	1.85579	0.167021	0.351514	0.0235514	5.92	0.06	52.3136
4	10003	-32.8721	-71.8924	24.02.2022	15:00:18	5	-2.07579	0.114438	0.15	8.0166	0.0320664	10.3015	7.72496	1.80428	8.13581	1.3985	0.360903	1.9305	0.285366	2.26573	0.653411	2.12277		1.63119	0.255509	0.410597	0.0686971	3.18087	0.224174	1.59267	0.143341	0.259616	0.0173942	6.27	0.06
5	10004	-32.4993	-71.9985	24.02.2022	19:34:46	5	-2.12984	0.121878	0.15	7.75842	0.0310337	9.3846	6.70267	1.63678	7.3738	1.35029	0.353529	1.9992	0.296277	2.3233	0.686666	2.14076		1.58928	0.245946	0.391783	0.0655565	3.39726	0.239448	1.79328	0.161395	0.278185	0.0186384	7.95	0.27	28.6841
7	10008	-32.5	-73.7999	26.02.2022	07:46:07	5	-1.81265	0.154121	0.15	7.66937	0.0306775	9.76278	6.6692	1.71425	7.84042	1.41628	0.378265	2.05567	0.310733	2.47397	0.721973	2.27672		1.71126	0.271262	0.373631	0.0625081	3.50608	0.247422	1.52648	0.137383	0.576331	0.0386142	2.04	0.33	23.2338
8	10010	-32.5001	-76.6003	27.02.2022	00:02:19	5	-2.64171	0.138628	0.15	6.33994	0.0253598	7.96612	4.79895	1.40749	6.15075	1.06996	0.286911	1.69769	0.252623	1.93686	0.544973	1.71497		1.0786	0.166042	0.3286	0.0549654	2.71868	0.191007	1.62795	0.146516	2.0783	0.139246	1.74	0.06	22.6842
10	10014	-32.4982	-81.9992	28.02.2022	18:33:59	5	-4.32287	0.150389	0.15	4.89573	0.0195829	6.64162	3.41726	1.06436	4.69931	0.78336	0.212332	1.27314	0.187721	1.45851	0.418389	1.24564		0.719571	0.104454	0.292534	0.049056	2.31723	0.163138	0.808237	0.0727413	1.10378	0.0739534	1.48	0.4	21.1518
12	10021	-32.4978	-87.9996	02.03.2022	09:17:28	5	-6.19953	0.161764	0.161764	3.82931	0.0153172	5.7157	3.62241	1.0076	4.44872	0.793454	0.198393	1.22915	0.186755	1.42782	0.419996	1.29641		0.758264	0.115825	0.346036	0.0578855	2.64473	0.186042	0.289365	0.0260428	4.11669	0.275818	0.83	0.01	12.4881
14	10029	-32.4997	-94.0009	04.03.2022	04:25:03	5	-5.44093	0.176663	0.176663	3.143	0.012572	3.91083	2.00736	0.715932	3.20439	0.550781	0.160603	1.0188	0.158531	1.21876	0.374091	1.14063		0.649452	0.0912118	0.275631	0.0460617	3.03772	0.21429	0.281477	0.025333	0.105784	0.00708751	0.88	0.05	8.91298
16	10036	-32.5001	-99.8956	05.03.2022	16:36:00	3	-5.20035	0.183164	0.183164	3.14608	0.0125843	3.95674	1.95444	0.72844	3.23207	0.567982	0.162287	0.960696	0.152063	1.25427	0.380013	1.1544		0.645057	0.0991145	0.264583	0.0442088	3.11293	0.219073	0.259537	0.0233583	0.0658	0.0044086	1.54	0.26	14.6607
18	10042	-31.4301	-105.919	07.03.2022	12:30:00	3	-4.11061	0.124378	0.15	2.93747	0.0117499	3.87136	2.43487	0.747464	3.12574	0.572486	0.159864	0.921109	0.142378	1.18099	0.361934	1.08784		0.633894	0.0908464	0.329709	0.0550195	2.97382	0.208171	0.340808	0.0306727	0.150232	0.0100655	1.68	0.08	15.6598
19	10045	-31.43	-107.854	08.03.2022	02:27:00	3	-3.39281	0.109587	0.15	3.09031	0.0123613	3.64071	1.93047	0.689942	3.13336	0.567127	0.168531	0.958199	0.159863	1.25821	0.376	1.18211		0.758661	0.110965	0.280344	0.0468056	3.72518	0.263026	0.414019	0.0372617	0.0834255	0.00558951	2.44	0.29	14.2135
22	10050	-31.4624	-111.99	09.03.2022	19:04:00	3	-2.8301	0.138908	0.15	3.91625	0.015665	4.70213	3.67122	0.940869	4.10734	0.811817	0.207477	1.23793	0.193202	1.45154	0.422046	1.27808		0.809879	0.119734	0.40258	0.0671136	2.99498	0.210533	0.463871	0.0417484	0.0916553	0.00614091	3.7	0.01
24	10055	-31.4301	-115.927	11.03.2022	06:07:00	3	-2.36022	0.133645	0.15	3.68826	0.014753	4.65758	3.35475	0.914539	4.11205	0.81951	0.216471	1.19123	0.185705	1.46609	0.428091	1.31264		0.839941	0.121995	0.374669	0.0624932	3.11782	0.219931	0.52158	0.0469422	0.239723	0.0160614	2.22	0.11	14.7695
26	10061	-31.4301	-120.708	12.03.2022	20:37:00	3	-3.01396	0.114718	0.15	4.23846	0.0169539																							2.34	0.38	18.0676
28	10064	-31.4301	-127.893	14.03.2022	16:36:00	3	-1.71523	0.113283	0.15	3.25663	0.0130265	3.31504	2.16371	0.863008	3.53944	0.714941	0.179691	0.991101	0.165829	1.26803	0.414238	1.17275		0.748593	0.112177	0.295024	0.0488099	3.14039	0.219202	0.439136	0.0395223	0.142328	0.00953601	4.44	0.37	19.5448
31	10073	-31.43	-137.934	17.03.2022	17:18:00	3	-1.83331	0.142327	0.15	3.08428	0.0123371	4.31911	3.67085	0.855484	3.59322	0.659293	0.190234	1.04658	0.170723	1.33909	0.390324	1.19603		0.790708	0.115278	0.44032	0.0734259	3.2605	0.228286	0.490689	0.044162	0.172076	0.0115291	5.17	0.13	18.0632
33	10078	-26.1708	-152.019	24.03.2022	08:52:00	3	-0.271757	0.109915	0.15	3.70566	0.0148226	3.28976	2.10977	0.770234	3.45205	0.713446	0.2022	1.14054	0.183869	1.44425	0.430286	1.25731		0.858711	0.124463	0.306319	0.0508378	3.78753	0.267088	0.831933	0.0748739	0.174745	0.0117079	6.41	0.06	19.0379
35	10085	-26.1699	-159.942	26.03.2022	02:04:00	3	0.19	0.1	0.15	3.82359	0.0152944	3.19021	2.62352	0.929606	3.73621	0.759959	0.208173	1.18344	0.19262	1.49059	0.44468	1.31599		0.865746	0.129045	0.349479	0.057623	3.39841	0.2367	0.903799	0.0813419	0.110997	0.0074368	6.74	0.1	18.4038
36	10090	-26.1701	-163.933	27.03.2022	01:39:00	3	0.0373134	0.125625	0.15	3.24628	0.0129851	2.75272	2.06557	0.647746	2.96927	0.609049	0.198339	1.01876	0.164626	1.33317	0.385994	1.21383		0.770632	0.117266	0.357495	0.0593226	4.08866	0.288795	0.677247	0.0609522	0.0874666	0.00586026	9.77	0.15	16.6695
37	10096	-26.1716	-167.955	28.03.2022	07:23:00	3	0.438977	0.0958342	0.15	4.12479	0.0164992	3.27387	2.29759	1.08516	4.01982	0.904032	0.231498	1.23656	0.199098	1.61037	0.454017	1.39518		0.973317	0.153756	0.276876	0.0454734	3.51144	0.242105	0.874821	0.0787339	0.106687	0.00714805	9.11	0.13	16.826
38	10102	-26.1701	-171.917	29.03.2022	08:38:00	3	0.503167	0.110623	0.15	3.37916	0.0135166	2.96731	2.41161	0.949408	4.16249	0.687645	0.221262	1.18903	0.18865	1.51542	0.653136	1.35671		0.92977	0.140164	0.327376	0.0538251	3.43227	0.241309	0.981813	0.0883632	0.106835	0.00715797	8.63	0.09	17.4243
39	10107	-26.1667	-175.353	30.03.2022	08:32:00	3	0.678089	0.121959	0.15	3.8465	0.015386	3.33639	3.06915	0.962644	4.04918	0.856817	0.247189	1.29374	0.208053	1.64018	0.476833	1.40622		1.00746	0.147538	0.393098	0.0648344	3.69706	0.258875	1.10747	0.0996721	0.307407	0.0205962	7.76	0.06	21.3598
40	10111	-25.8832	-177.134	31.03.2022	04:15:00	3	0.782045	0.108922	0.15	4.4129	0.0176516	3.62952	3.15819	0.943229	4.09608	0.868552	0.25986	1.35301	0.215579	1.71835	0.472575	1.47001		1.0582	0.163383	0.393676	0.0651348	3.99943	0.280783	0.882911	0.079462	0.131792	0.00883005	8.03	0.05	17.0338
41	10114	-25.7181	-178.786	31.03.2022	23:37:00	3				4.02193	0.0160877	3.92885	3.62659	0.926146	4.16527	0.89099	0.2723	1.38941	0.222978	1.71124	0.509109	1.55132		1.13925	0.172337	0.439374	0.0729057	4.25933	0.300265	0.772523	0.0695271	0.194562	0.0130357	6.63	0.1	18.9094
42	10118	-25.7184	179.035	01.04.2022	11:27:00	3	0.856407	0.108404	0.15	3.8808	0.0155232	3.31744	2.89686	0.869683	3.85029	0.817704	0.245588	1.3126	0.215048	1.62229	0.488507	1.45273		1.03043	0.156473	0.393233	0.0650446	4.14566	0.291738	0.913861	0.0822475	0.128375	0.0086011	7.96	0.11	16.6769
43	10124	-25.7233	175.466	03.04.2022	00:08:00	3	0.477113	0.139023	0.15	4.19486	0.0167795	3.66882	3.43699	0.969055	4.18474	0.891838	0.251019	1.38164	0.223288	1.71869	0.500885	1.54094		1.10314	0.165489	0.420173	0.069485	4.01261	0.281669	2.11027	0.189924	0.253451	0.0169812	8.35	0.04	17.1162
44	10130	-25.8283	172.045	03.04.2022	15:12:00	3	-0.182798	0.141629	0.15	7.25	0.029	6.38379	5.43395	1.96059	7.25136	1.48871	0.398551	2.00992	0.308696	2.38012	0.638193	1.9144		1.47486	0.234709	0.351104	0.0577984	2.95835	0.203908					8.74	0.2	27.4061
Additional samples for REE and TEs measurement
39-40	10108	-26.0836	-175.907	30.03.2022	22:17:00	3						2.76412	2.71508	0.662644	3.20349	0.693171	0.216282	1.15415	0.198841	1.49869	0.443482	1.40117		0.953124	0.140538	0.463548	0.076879	4.72513	0.3358	0.896671	0.0807003	0.241784	0.0161995	9.04	0.03
	10109	-26.0151	-176.326	31.03.2022	00:18:00	3						2.64904	2.45964	0.655316	3.13179	0.677336	0.213525		0.192051	1.50726	0.448327	1.359		1.09839	0.142336	0.431129	0.0714361	5.21384	0.370829	0.823869	0.0741482	0.26527	0.0177731	7.99	0.16
	10110	-25.9435	-176.766	31.03.2022	02:24:00	3						2.76514	2.63294	0.689746	3.33072	0.72865	0.21806	1.20511	0.195336	1.55623	0.449512	1.39782		0.962211	0.145014	0.440214	0.0729235	4.63521	0.329256	0.874546	0.0787091	0.202715	0.0135819	7.76	0.11
40-41	10112	-25.8397	-177.53	31.03.2022	12:28:00	3						2.70963	2.72976	0.689609	3.29765	0.697525	0.223296	1.20075	0.195395	1.52342	0.44967	1.3953		0.947979	0.142888	0.460867	0.0762993	4.59301	0.325924	0.893315	0.0803983	0.14473	0.00969689	8	0.1
	10113	-25.7699	-178.212	31.03.2022	15:32:00	3						2.95558	3.23585	0.734997	3.49313	0.70547	0.225351	1.14013	0.191355	1.49309	0.439106	1.3775		0.943641	0.140954	0.506968	0.0839893	4.28532	0.303937	0.755142	0.0679627	0.10958	0.00734185	7.86	0.01
41-42	10115	-25.7183	-179.314	01.04.2022	02:13:00	3						2.98887	3.11827	0.762362	3.38888	0.742454	0.250838	1.30187	0.196591	1.52993	0.476731	1.42567		1.0393	0.176892	0.476716	0.0789179	5.04479	0.354506	0.758444	0.06826	0.232981	0.0156097	8.15	0.17
	10116	-25.7183	179.952	01.04.2022	06:19:00	3						2.75032	2.51869	0.692977	3.25462	0.68517	0.223079	1.18529	0.19522	1.51746	0.448869	1.37701		0.970289	0.141638	0.421159	0.0697462	4.65187	0.329643	0.865596	0.0779036	0.119872	0.00803142	9.46	0.09
	10117	-25.7184	179.426	01.04.2022	09:16:00	3						2.95685	2.57188	0.712587	3.36245	0.786922	0.23112	1.18903	0.199571	1.51028	0.447483	1.40732		0.956665	0.139398	0.409371	0.0678833	4.44481	0.315135	0.861057	0.0774951	0.12476	0.00835892	9.26	0.07
42-43	10120	-25.7184	177.777	02.04.2022	05:10:00	3						2.87375	2.99471	0.729309	3.54141	0.750843	0.236783	1.18518	0.198632	1.56576	0.454664	1.43403		0.983775	0.147131	0.477436	0.0790491	4.45111	0.316401	2.07602	0.186842	0.271087	0.0181628	7.65	0.02
	10121	-25.7185	177.344	02.04.2022	07:20:00	3						2.55433	2.50852	0.654093	3.24842	0.690986	0.227757	1.18702	0.192516	1.51239	0.431195	1.37865		1.00337	0.150376	0.447807	0.0741236	5.00282	0.356438	1.97233	0.17751	0.424549	0.0284448	8.8	0.01
	10122	-25.7184	176.867	02.04.2022	09:45:00	3						2.68217	2.73533	0.689759	3.27361	0.684896	0.225977	1.1962	0.190603	1.50004	0.440315	1.34925		0.964142	0.15088	0.463975	0.07679	4.77863	0.338623	1.96235	0.176611	0.485061	0.0324991	7.62	0.03
	10123	-25.7184	176.287	02.04.2022	12:42:00	3						2.86487	2.72607	0.681042	3.36587	0.712969	0.232936	1.16691	0.190428	1.54762	0.442047	1.38365		0.981067	0.147255	0.450994	0.0748154	4.71456	0.335724	1.80251	0.162226	0.270098	0.0180966	7.67	0.37
43-44	10125	-25.7429	174.755	03.04.2022	03:15:00	3						2.90002	2.43868	0.666736	3.26059	0.713538	0.222211	1.195	0.191437	1.50865	0.437289	1.36951		0.96835	0.139011	0.405363	0.0673113	4.67905	0.333064					7.88	0.16
	10126	-25.7605	174.218	03.04.2022	05:34:00	3						2.64028	2.5074	0.663587	3.25308	0.682949	0.220395	1.16307	0.186404	1.50531	0.442582	1.35814		0.960885	0.142477	0.437319	0.0724278	4.73247	0.33678					7.24	0.05
	10127	-25.78	173.627	03.04.2022	08:12:00	3						2.8773	2.9676	0.706006	3.46956	0.779769	0.252952	1.2442	0.201784	1.56667	0.456044	1.37592		1.03359	0.150706	0.48093	0.0797071	4.73902	0.337422					7.47	0.03
	10128	-25.8	173.014	03.04.2022	10:52:00	3						2.97166	2.93465	0.746723	3.6396	0.801205	0.255536	1.31625	0.208845	1.64748	0.468265	1.44779		1.04924	0.161324	0.454808	0.0753247	4.69067	0.333414					8.6	0.11
	10129	-25.8146	172.57	03.04.2022	12:53:00	3						2.77459	2.63452	0.690073	3.39894	0.753134	0.229543	1.21915	0.199294	1.58917	0.437235	1.41002		1.00325	0.148355	0.439653	0.0728369	4.73246	0.336959					7.74	0.05
Pumice sample												Pumice REE concentrations (ppm)
39-40				30.03.2022			7.53084	0.106773	0.24			1.67923	4.67903	0.774028	4.18407	1.4977	0.550458	2.22375	0.405832	2.87424	0.651231	1.9292	0.310899	2.09362	0.329103	0.893444	0.0212913	7.06063	0.471798

## Sheet: REE reference materials
		La	Ce	Pr	Nd	Sm	Eu	Gd	Tb	Dy	Ho	Er	Tm	Yb	Lu
Seawater references (unit: pmol/kg)
BATS 15 m	average value	14.8843	11.4365	3.16606	14.5144	3.20431	0.893708	4.80266	0.831699	5.98675	1.53089	4.85898		4.24814	0.659992
(n=11)	2SD	0.952265	1.3228	0.188159	0.619465	0.13796	0.0395918	0.136037	0.104474	0.187272	0.0428748	0.176202		0.124798	0.024053
	RSD (%2SD)	6.3978	11.5665	5.94299	4.26795	4.30547	4.43006	2.83254	12.5615	3.1281	2.80065	3.62631		2.9377	3.64444
	reference value1	14.7434	12.0183	3.11546	14.1223	3.20564	0.888392	4.83307	0.792802	5.90154	1.48548	4.80091		4.15511	0.668686
	reference value 2SD1	2.21006	2.74051	0.36903	1.24099	0.359138	0.105291	0.5469	0.081797	0.523077	0.13339	0.424489		0.514332	0.0914442
BATS 2000 m	average value	24.1926	4.89581	4.07562	17.7423	3.4473	0.895353	4.81958	0.768011	5.84554	1.53836	5.03175		4.79753	0.789591
(n=11)	2SD	1.19478	0.486243	0.166892	0.561194	0.115094	0.0241056	0.103278	0.0254239	0.146361	0.0343778	0.100744		0.116088	0.0323417
	RSD (%2SD)	4.93864	9.93182	4.09488	3.16303	3.33866	2.6923	2.14289	3.31036	2.5038	2.2347	2.00217		2.41974	4.096
	reference value1	23.6052	5.11704	4.03094	17.3253	3.45172	0.908134	4.83943	0.78651	5.80308	1.52186	5.04006		4.7619	0.805852
	reference value 2SD1	2.79318	2.26948	0.354836	1.22019	0.339186	0.0987102	0.527822	0.0755049	0.381538	0.0909477	0.251106		0.248497	0.0400069
Station 36, 5 m (GP21)	average value	2.89925	2.20126	0.659517	3.0842	0.635781	0.193176	1.02922	0.170094	1.35033	0.389636	1.22397		0.788714	0.11559
(n=6)	2SD	0.257695	0.327498	0.0518261	0.233956	0.0562717	0.0110782	0.0246381	0.00927413	0.0633885	0.0160183	0.0510441		0.0267886	0.00551792
	RSD (%2SD)	8.88832	14.8777	7.85819	7.58565	8.85079	5.73477	2.39385	5.45236	4.69428	4.11109	4.17037		3.39649	4.77372
Station 36, 5289 m (GP21)	average value	41.2209	4.26134	6.26095	26.8805	4.91879	1.26287	6.64736	1.02947	7.91864	2.13397	7.09995		7.44911	1.29205
(n=6)	2SD	1.84238	0.705215	0.237379	0.898936	0.118874	0.0216649	0.0750681	0.0306175	0.166936	0.0304266	0.169486		0.173667	0.0415987
	RSD (%2SD)	4.46954	16.5491	3.79142	3.3442	2.41672	1.71554	1.12929	2.97412	2.10814	1.42582	2.38715		2.33138	3.21959
Cruise Blank (n=3)		0.0973852	0.177465	0.0160922	0.0746475	0.0100238	0.00618502	0.00663777	0.00349861	0.00923319	0.00618347	0.00542768		0.00651503	0.000791037
Limits of Detection		0.0327283	0.000831908	0.00639851	0.00672887	0.0102592	0.00167726	0.0203963	0.00261102	0.00419829	0.000870915	0.00562331		0.00715459	0.0010213
Solid reference (unit: ppm)
BHVO-2	average value	14.7539	37.4127	5.2393	24.0634	6.09362	2.10312	5.72849	0.911086	5.48924	1.01287	2.57073	0.339587	2.04162	0.282617
(n=3)	2SD	0.397018	0.478034	0.128283	0.228801	0.20384	0.05697	0.0713554	0.0278086	0.036298	0.0286643	0.0767931	0.017413	0.1553	0.0170417
	RSD (%2SD)	2.69094	1.27773	2.44848	0.950828	3.34513	2.70883	1.24562	3.05225	0.661257	2.83	2.98721	5.12771	7.60667	6.02997
	reference value2	15.2	37.53	5.339	24.27	6.023	2.043	6.207	0.9392	5.28	0.9887	2.511	0.3349	1.994	0.2754
	reference value 2SD2	0.08	0.19	0.028	0.25	0.057	0.012	0.038	0.006	0.028	0.0053	0.014	0.0031	0.027	0.0024
reference value from:
1 van de Flierdt, T. et al. GEOTRACES intercalibration of neodymium isotopes and rare earth element concentrations in seawater and suspended particles. Part 1: Reproducibility of results for the international intercomparison. Limnol. Oceanogr. Methods 10, 234–251 (2012).
2 Jochum, K. P. et al. GeoReM: A New Geochemical Database for Reference Materials and Isotopic Standards. Geostand. Geoanalytical Res. 29, 333–338 (2005).
